# Supplementary material
Source: PubMed Central journal article supplement (PMC3307254)
Supplement: supp_M111.326264_jbc.M111.326264-1.pdf [file supp_M111.326264_jbc.M111.326264-1.pdf]

**Supplementary Table 1.** X-ray data collection and refinement statistics

| Protein:RNA complex                    | FBF-2: <i>gld-1</i> FBEa13  | FBF-2:mutant FBEa13 | PUF-6:5BE13                                   |
|----------------------------------------|-----------------------------|---------------------|-----------------------------------------------|
| <b>Data collection</b>                 |                             |                     |                                               |
| Space group                            | P6 <sub>1</sub>             | P6 <sub>1</sub>     | P2 <sub>1</sub> 2 <sub>1</sub> 2 <sub>1</sub> |
| Unit cell dimensions                   | <i>a, b, c</i> (Å)          |                     |                                               |
|                                        | $\alpha, \beta, \gamma$ (°) |                     |                                               |
| Resolution (Å)                         | 98.5, 98.5, 108.0           | 99.8, 99.8, 105.6   | 67.8, 87.8, 129.8                             |
| $R_{\text{sym}}$ or $R_{\text{merge}}$ | 90.0, 90.0, 120.0           | 90.0, 90.0, 120.0   | 90.0, 90.0, 90.0                              |
| $I / \sigma I$                         | 50-2.30 (2.34-2.30)         | 50-2.50 (2.59-2.50) | 50-2.90 (3.00-2.90)                           |
| Completeness (%)                       | 0.094 (0.65)                | 0.099 (0.68)        | 0.073 (0.54)                                  |
| Redundancy                             | 17.7 (2.3)                  | 26.1 (3.8)          | 16.6 (2.4)                                    |
|                                        | 99.9 (100)                  | 99.8 (100)          | 99.1 (98.5)                                   |
|                                        | 5.5 (4.5)                   | 11.2 (11.2)         | 4.0 (3.9)                                     |
| <b>Refinement</b>                      |                             |                     |                                               |
| Resolution (Å)                         | 24.01-2.30                  | 31.20-2.50          | 36.47-2.90                                    |
| No. reflections                        | 26,381                      | 19,320              | 16,837                                        |
| $R_{\text{work}} / R_{\text{free}}$    | 0.177/0.227                 | 0.190 / 0.249       | 0.206 / 0.241                                 |
| No. atoms                              |                             |                     |                                               |
| Protein                                | 3140                        | 3130                | 2930                                          |
| RNA                                    | 232                         | 214                 | 145                                           |
| Water                                  | 318                         | 89                  | 0                                             |
| <i>B</i> -factors                      |                             |                     |                                               |
| Protein                                | 38.9                        | 44.6                | 69.20                                         |
| RNA                                    | 43.7                        | 48.2                | 79.37                                         |
| Water                                  | 44.9                        | 40.4                | N/A                                           |
| R.m.s deviations                       |                             |                     |                                               |
| Bond lengths (Å)                       | 0.007                       | 0.008               | 0.006                                         |
| Bond angles (°)                        | 0.80                        | 1.10                | 0.88                                          |

\*Values in parentheses are for highest-resolution shell.

**Supplementary Table 2.** RNA-binding analyses of wild-type and mutant FBF-2. Upstream cytosines, when present, are indicated in boldface. N.D. indicates not determined.

| RNA                                                  | FBF-2 WT<br>K <sub>d</sub> (nM) | FBF-2 S554A<br>K <sub>d</sub> (nM) |
|------------------------------------------------------|---------------------------------|------------------------------------|
| <u>UGUGCCAUA</u> ( <i>gld-1</i> FBEa9)               | 27.7 ± 0.4                      | 26.6 ± 0.8                         |
| <b>U</b> <u>CAUGUGCCAUA</u> C ( <i>gld-1</i> FBEa13) | 3.01 ± 0.09                     | 9.9 ± 0.3                          |
| UAA                                                  | 57.3 ± 2.0                      | 20.9 ± 0.2                         |
| <b>UAC</b>                                           | 3.9 ± 1.2                       | 7.8 ± 0.8                          |
| <b>CAA</b>                                           | 42.8 ± 3.3                      | 19.5 ± 1.1                         |
| AAA                                                  | 70.1 ± 3.5                      | 20.7 ± 1.9                         |
| GAG                                                  | 64.6 ± 4.4                      | 16.7 ± 1.1                         |
| UUA                                                  | 39.5 ± 3.0                      | 17.7 ± 0.3                         |
| <b>U</b> <u>CUUGUGUCAUUC</u> ( <i>fem-3</i> PME13)   | 3.4 ± 0.5                       | N.D.                               |
| <b>U</b> <u>CUUGUAAAAUCU</u> ( <i>fog-1</i> FBEa13)  | 5.8 ± 0.4                       | N.D.                               |
| <b>UUC</b> <u>UGUGUUAUCU</u> ( <i>gld-1</i> FBEb13)  | 4.1 ± 0.4                       | N.D.                               |

**Supplementary Table 3.** RNA-binding analyses of wild-type and mutant PUF-6. Upstream cytosines, when present, are indicated in boldface.

| RNA                                  | PUF-6 WT<br>K <sub>d</sub> (nM) | PUF-6 S441A<br>K <sub>d</sub> (nM) |
|--------------------------------------|---------------------------------|------------------------------------|
| <u>UGUAUCUUGU</u> (5BE10)            | 73.8 ± 8.5                      | 38.5 ± 2.2                         |
| <b>CUC</b> <u>UGUAUCUUGU</u> (5BE13) | 7.4 ± 1.5                       | 27.3 ± 6.5                         |
| CUU                                  | 27.9 ± 4.7                      | 39.5 ± 1.5                         |
| <b>CCU</b>                           | 23.8 ± 2.7                      | 42.5 ± 3.4                         |

**Supplementary Table 4.** RNA-binding analyses of wild-type and mutant PUF-11. Upstream cytosines, when present, are indicated in boldface.

| RNA                                     | PUF-11 WT<br>K <sub>d</sub> (nM) | PUF-11 S491A<br>K <sub>d</sub> (nM) |
|-----------------------------------------|----------------------------------|-------------------------------------|
| <b>UAC</b> <u>UGUGAAUAGG</u> (11BE I-1) | 0.05 ± 0.003                     | 3.2 ± 0.2                           |
| UAA                                     | 2.9 ± 0.3                        | 2.9 ± 0.3                           |
| <b>UCA</b>                              | 0.11 ± 0.03                      | 4.9 ± 0.2                           |
| <b>CAA</b>                              | 1.3 ± 0.3                        | 5.5 ± 0.6                           |

# Supplementary Figure 1

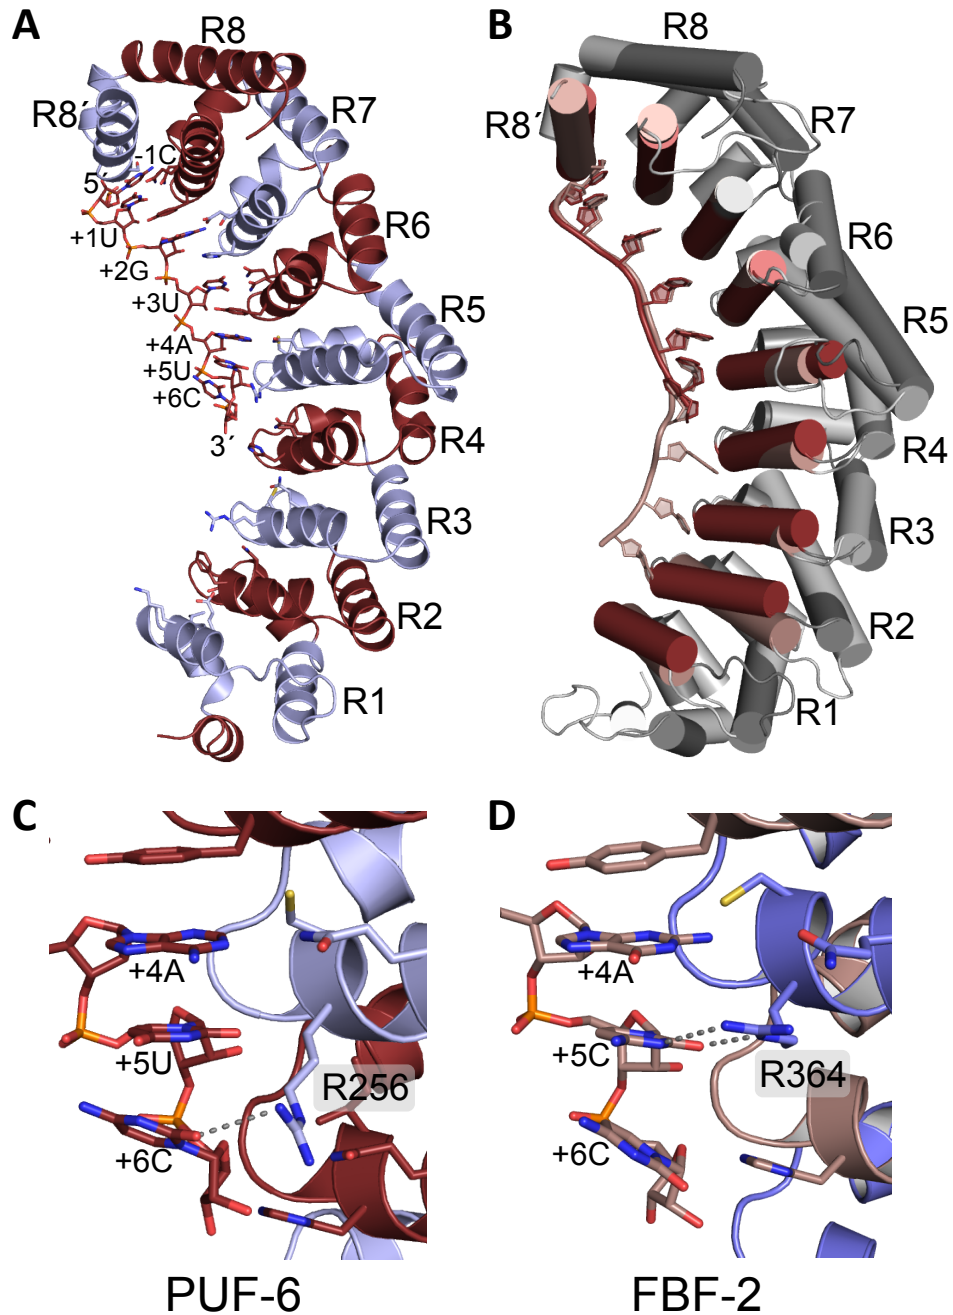

**SUPPLEMENTARY FIGURE 1.** Crystal structure of *C. elegans* PUF-6 RNA-binding domain. A. Ribbon diagram of PUF-6 in complex with 5BE RNA. B. Superposition of PUF-6 (maroon) and FBF-2 (mauve) RNA-binding domains. RNA-interacting helices are colored as indicated. C. Interaction of PUF-6 with bases +4 to +6. D. Interaction of FBF-2 with bases +4 to +6 of FBEa RNA. In panels C and D, dashed lines indicate hydrogen bond interactions with R256 and R364, respectively.
